# Supplementary material
Source: Springer Nature journal article supplement (https://www.springermedizin.de/resource/supplementary/12885_2011_2910_MOESM3_ESM.pdf/9462258)

The final DUSP-9 expression score

15  
10  
5  
0

T

N

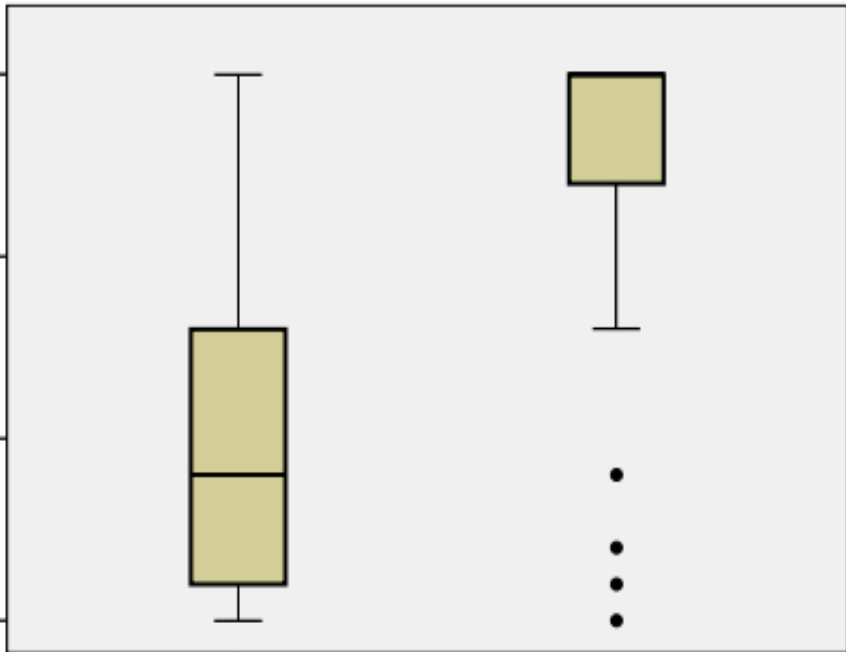

Supplement: MOESM3 [file 9462258]
